# Supplementary material
Source: Springer Nature journal article supplement (https://www.springermedizin.de/resource/supplementary/12943_2011_887_MOESM5_ESM.pdf/9551948)

CTL (0)

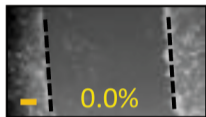

CTL (16h)

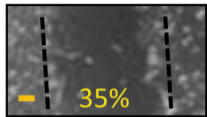

MSP

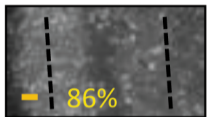

M+T

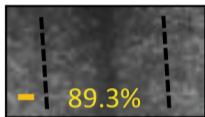

CP-1

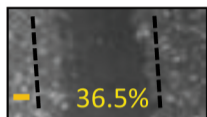

PD

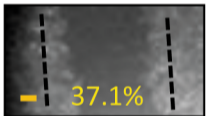

SL0101

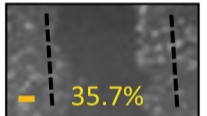

M+CP-1

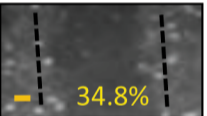

M+T+CP-1

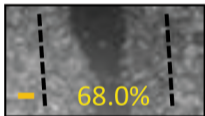

M+PD

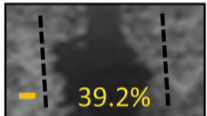

M+T+PD

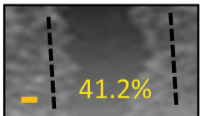

M+SL

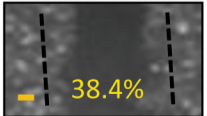

M+T+SL

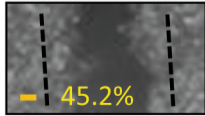

Supplement: MOESM5 [file 9551948]
